# Supplementary material
Source: HighWire-hosted journal article supplement (https://cmajopen.ca/highwire/filestream/84913/field_highwire_adjunct_files/4/CMAJOpen-2020-0177-2-at.pdf)
Supplement: CMAJOpen-2020-0177-2-at.pdf [file CMAJOpen-2020-0177-2-at.pdf]

**Appendix 2 (as supplied by the authors):** The definition variables used in the study

| <b>Variables</b>                      | <b>Description</b>                                                                                  |                                |
|---------------------------------------|-----------------------------------------------------------------------------------------------------|--------------------------------|
| <b><i>Outcome Variables</i></b>       |                                                                                                     |                                |
| Psychological distress scale          | The Kessler Psychological Distress Scale (K10) score: continuous variable ranging between 10 and 50 |                                |
| Lifetime suicide ideation             | 1 = if the individual ever considered suicide in the lifetime, 0 otherwise                          |                                |
| Lifetime suicide plan                 | 1 = if the individual ever planned suicide in the lifetime, 0 otherwise                             |                                |
| <b><i>Demographic Variables</i></b>   |                                                                                                     |                                |
| Indigenous Identity                   |                                                                                                     |                                |
| Non-Indigenous                        | 1 = if the individual is self-identified as a non-Indigenous person, 0 otherwise                    |                                |
| Indigenous                            | 1 = if the individual is self-identified as an Indigenous person, 0 otherwise                       |                                |
| Sex                                   |                                                                                                     |                                |
| Male                                  | 1 = if the individual is male, 0 otherwise                                                          |                                |
| Female                                | 1 = if the individual is female, 0 otherwise                                                        |                                |
| Age                                   |                                                                                                     | Age of the individual in years |
| Marital Status                        |                                                                                                     |                                |
| Married or common law                 | 1 = if the individual is married or common law, 0 otherwise                                         |                                |
| Divorced or widowed                   | 1 = if the individual is divorced or widowed, 0 otherwise                                           |                                |
| Single                                | 1 = if the individual is single, 0 otherwise                                                        |                                |
| <b><i>Socioeconomic Variables</i></b> |                                                                                                     |                                |
| Equivalized Household Income          | Household income divided by the square root of household size                                       |                                |
| Education                             |                                                                                                     |                                |
| Less than high school                 | 1 = if the individual has less than secondary education, 0 otherwise                                |                                |
| High school                           | 1 = if the individual has secondary education, 0 otherwise                                          |                                |
| Some post-secondary                   | 1 = if the individual has some post-secondary education, 0 otherwise                                |                                |
| Bachelor's degree or higher           | 1 = if the individual has post-secondary degree/diploma, 0 otherwise                                |                                |
| Employment Status                     |                                                                                                     |                                |
| Employed                              | 1 = if the individual is employed, 0 otherwise                                                      |                                |
| Unemployed                            | 1 = if the individual is unemployed, 0 otherwise                                                    |                                |

---

|                                        |                                                                                                                                                   |
|----------------------------------------|---------------------------------------------------------------------------------------------------------------------------------------------------|
| Other employment status                | 1 = if the individual is not in labour force or unable to work, 0 otherwise                                                                       |
| <b>Homeownership</b>                   |                                                                                                                                                   |
| Owner                                  | 1 = if the individual owns the dwelling, 0 otherwise                                                                                              |
| Renter                                 | 1 = if the individual rents the dwelling, 0 otherwise                                                                                             |
| <b>Household Arrangement</b>           |                                                                                                                                                   |
| Single person                          | 1 = if the household composition is single person, 0 otherwise                                                                                    |
| Couple with no child                   | 1 = if the household composition is couple with no child, 0 otherwise                                                                             |
| Couple with child(ren) younger than 25 | 1 = if the household composition is couple with a child(ren) less than 25, 0 otherwise                                                            |
| Separate with Child younger than 25    | 1 = if the household composition is separate with child(ren) less than 25, 0 otherwise                                                            |
| Other household compositions           | 1 = if the household composition is other, 0 otherwise                                                                                            |
| <b><i>Geographical Factors</i></b>     |                                                                                                                                                   |
| <b>Urbanicity</b>                      |                                                                                                                                                   |
| Urban                                  | 1 = if the individual resides in an urban area, 0 otherwise                                                                                       |
| Rural                                  | 1 = if the individual resides in a rural area, 0 otherwise                                                                                        |
| <b>Geographic Region</b>               |                                                                                                                                                   |
| Atlantic (AT)                          | 1 = if the individual resides in Newfoundland and Labrador (NL), Prince Edward Island (PEI), Nova Scotia (NS) and New Brunswick (NB), 0 otherwise |
| Quebec (QC)                            | 1 = if the individual resides in QC, 0 otherwise                                                                                                  |
| Ontario (ON)                           | 1 = if the individual resides in ON, 0 otherwise                                                                                                  |
| Prairie (PR)                           | 1 = if the individual resides in Manitoba (MB), Saskatchewan (SK), and Alberta (AB), 0 otherwise                                                  |
| British Columbia (BC)                  | 1 = if the individual resides in BC, 0 otherwise                                                                                                  |

---
